# Supplementary material for: Machine Learning-Based Peripheral Artery Disease Identification Using Laboratory-Based Gait Data
Source: MDPI journal article supplement (doi:10.3390/s22197432), 2022-09-30
Supplement: s1 [file s1]

# Machine Learning-Based Peripheral Artery Disease Identification Using Laboratory-Based Gait Signatures (Python Code)

Here, we provide a detailed step by step demonstration of data preprocessing and machine learning application to distinguish between patients with PAD and healthy controls.

## Part 1 - Data Preprocessing

### Python Code S1.1: Import Libraries

```
import numpy as np
import matplotlib.pyplot as plt
import pandas as pd
import seaborn as sn

from sklearn.preprocessing import LabelEncoder
from sklearn.model_selection import train_test_split
from sklearn.preprocessing import StandardScaler

from collections import Counter
from imblearn.over_sampling import SMOTE
import tensorflow as tf
import numpy
import keras
import keras.utils
from keras import utils as np_utils
from keras.models import Sequential
from keras.layers import Dense

from sklearn import svm
from sklearn import metrics
import imblearn.metrics
from keras.backend import sqrt
from math import log, pi
from sklearn.svm import SVC
from sklearn.ensemble import RandomForestClassifier
from sklearn.linear_model import LogisticRegression
from sklearn.metrics import confusion_matrix, accuracy_score

# fix random seed for reproducibility
```

```

numpy.random.seed(7)
tf.compat.v1.random.set_random_seed(1234)

# we use an early stop mechanism to avoid over training model.
def earlystopping(min_delta, patience):
    es_cb = tf.keras.callbacks.EarlyStopping(monitor='loss',
                                              min_delta=min_delta,
                                              patience=patience,
                                              restore_best_weights=False)

    return es_cb

```

## Python Code S1.2: Import Dataset

```
dataset = pd.read_csv('~.csv')
```

Table S1: Description of Predictive feature and data types

| Data Feature Source                                | Feature Name                     | Data Feature Type |
|----------------------------------------------------|----------------------------------|-------------------|
| Ground Reaction Forces - Anteroposterior component | Braking peak                     | float             |
|                                                    | Zero-crossing                    | float             |
|                                                    | Propulsive peak                  | float             |
|                                                    | Braking impulse                  | float             |
|                                                    | Propulsive impulse               | float             |
| Ground Reaction Forces - Mediolateral component    | Lateral peak                     | float             |
|                                                    | Medial peak                      | float             |
| GRF - Vertical component                           | Loading response peak            | float             |
|                                                    | Midstance valley                 | float             |
|                                                    | Terminal stance peak             | float             |
| Ankle Joint Angle                                  | Ankle plantarflexion maximum     | float             |
|                                                    | Ankle dorsiflexion maximum       | float             |
| Ankle Torque                                       | Ankle dorsiflexor peak torque    | float             |
|                                                    | Ankle plantar flexor peak torque | float             |
| Ankle Power                                        | Early power absorption           | float             |
|                                                    | Peak power absorption            | float             |
|                                                    | Peak power generation            | float             |
| Hip Joint Angle                                    | Hip Flexion Maximum              | float             |
|                                                    | Hip Extension Maximum            | float             |
| Hip Torque                                         | Hip Flexor peak torque           | float             |
|                                                    | Hip Extensor peak torque         | float             |
| Hip Power                                          | Early peak power generation      | float             |
|                                                    | Peak power absorption            | float             |
|                                                    | Peak power generation            | float             |
| Knee Joint Angle                                   | Knee Flexion Maximum             | float             |
|                                                    | Knee Extension Maximum           | float             |
| Knee Torque                                        | Knee Flexor peak torque          | float             |
|                                                    | Knee Extensor peak torque        | float             |
| Knee Power                                         | Early peak power absorption      | float             |
|                                                    | Peak power generation            | float             |
|                                                    | Peak power absorption            | float             |
| Other Features                                     | Condition                        | Binary            |

## Python Code S1.3: Splitting the dataset into the Training set and Test set

```
X_train, X_test, y_train, y_test = train_test_split(X, y, test_size = 0.25, random_state =0)
print("y_train: ",Counter(y_train))
print("y_test: ",Counter(y_test))
print("PAD to Healthy Ratio in the Training Set:", round(217/50, 2))
print("PAD to Healthy Ratio in the Testing Set:", round(73/16, 2))

y_train: Counter({1: 217, 0: 50})
y_test: Counter({1: 73, 0: 16})
PAD to Healthy Ratio in the Training Set: 4.34
PAD to Healthy Ratio in the Testing Set: 4.56
```

Here, we maintain a close ratio between healthy controls and patients with PAD in the training and testing sets. for instance, in training set the PAD to healthy ratio is 4.34, and in the testing set is 4.54.

## Python Code S1.4: Feature Scaling

```
sc = StandardScaler()
X_train = sc.fit_transform(X_train)
X_test = sc.transform(X_test)
```

## Python Code S1.5: SMOTE Oversampling of Training Data

To mitigate the effect of the data imbalance we apply SMOTE oversampling on the healthy controls data. This increases the sample size of healthy controls to equal the sample size of patients with PAD.

```
print("Before oversampling: ",Counter(y_train))
# define oversampling strategy
SMOTE = SMOTE()

# fit and apply the transform
X_train, y_train = SMOTE.fit_resample(X_train, y_train)

# summarize class distribution
print("After oversampling: ",Counter(y_train))

Before oversampling: Counter({1: 217, 0: 50})
After oversampling: Counter({0: 217, 1: 217})
```

## Part 2 - Machine Learning Application

As described in the main text, we divide the data into multiple groups based on the data source (ankle, hip, knee, and GRF).

- Group 1: consists of **All** gait signatures
- Group 2: consists of **Ankle** gait signatures
- Group 3: consists of **Hip** gait signatures
- Group 4: consists of **Knee** gait signatures
- Group 5: consists of **GRF** gait signatures
- Group 6: consists of **ALL** gait signatures **except GRF**

We use four different machine learning algorithms to compare the performance:

- Neural Networks
- Support Vector Machines (SVM)
- Random Forest
- Logistic Regression

To measure the performance of each model we use several classification metrics because the data is imbalanced:

- Accuracy
- Mathew's Correlation Coefficient (MCC)
- Discriminant Power (DP)
- Geometric Mean (G-Mean)

## Group 1 Model Demo

This groups consists of all predictive gait signature features, including (ankle, hip, knee, and GRF). The code can be applied to other groups, but it requires changing hyperparameters for each algorithm as listed in the Tables in each section.

## Neural Networks

We fixed our neural networks architecture to have five hidden layers, the first and the last hidden layer consists of 24 neurons and the middle layers consists of 36 neurons. We set these number after applying grid search and manual tuning.

| Group Number | Category     | Activation Function | Weight Initializer | Optimizer | Learning Rate |
|--------------|--------------|---------------------|--------------------|-----------|---------------|
| 1            | All features | Relu                | glorot_uniform     | rms       | 0.001         |
| 2            | Ankle        | tanh                | glorot_uniform     | adam      | 0.0005        |
| 3            | Hip          | elu                 | glorot_normal      | rms       | 0.0001        |
| 4            | Knee         | tanh                | glorot_normal      | rms       | 0.001         |

|   |                |      |               |     |        |
|---|----------------|------|---------------|-----|--------|
| 5 | GRF            | tanh | glorot_normal | rms | 0.0001 |
| 6 | All except GRF | relu | glorot_normal | rms | 0.001  |

### Python Code S2.1: Neural Network Deep Learning Model Implementation

```
# Global Hyperparameters:
max_epochs = 1000
patience = 10
min_delta = 1e-5
batch_size = 10

# Group 1 Model and Hyperparameters

init_mode= 'glorot_uniform'
optimizer = tf.optimizers.RMSprop(learning_rate=0.001)
activation = 'relu'

# Model Architecture
ann = Sequential([
    Dense(units= 24 , activation=activation, kernel_initializer=init_mode), # First Hidden La
    Dense(units= 36 , activation=activation, kernel_initializer=init_mode), # Second Hidden L
    Dense(units= 36 , activation=activation, kernel_initializer=init_mode), # Third Hidden La
    Dense(units= 36 , activation=activation, kernel_initializer=init_mode), # Fourth Hideen L
    Dense(units= 24 , activation=activation, kernel_initializer=init_mode), # Fifth Hidden La

    Dense(1, activation= 'sigmoid')
])

ann.compile(loss=keras.losses.BinaryCrossentropy(from_logits=True),
            optimizer=optimizer,
            metrics=['accuracy'] )

ann_history = ann.fit(X_train, y_train,
                      epochs=max_epochs,
                      batch_size=batch_size,
                      callbacks=[earlystopping(min_delta, patience)])
```

### Python Code S2.2: Neural Network Model Scores

```
y_pred = ann.predict(X_test)
y_pred = (y_pred > 0.5)

cm = confusion_matrix(y_test, y_pred)

# calculate DP
sensitivity = imblearn.metrics.sensitivity_score(y_test, y_pred)
specificity = imblearn.metrics.specificity_score(y_test, y_pred)
D = sensitivity/(1-sensitivity)
P = specificity/(1-specificity)
DP = (numpy.sqrt(3)/pi)*(log(D) + log(P))
```

```

print("Confusion Matrix:")
print(cm)
print(f"Accuracy: {metrics.accuracy_score(y_test, y_pred): .3f}")
print(f"Matthew's correlation coefficient:{metrics.matthews_corrcoef(y_test, y_pred): .3f}")
print(f"G-mean:{imblearn.metrics.geometric_mean_score(y_test, y_pred, average='binary'): .3f}")
print(f"DP:{DP: .3f}")

```

## Output:

```

Confusion Matrix:
[[12  4]
 [ 6 67]]
Accuracy:  0.888
Matthew's correlation coefficient: 0.638
G-mean: 0.830
DP: 1.936

```

## SVM

| Table S3: SVM Model Hyperparameters |                |                              |        |                    |
|-------------------------------------|----------------|------------------------------|--------|--------------------|
| Group Number                        | Category       | Regularization parameter (C) | Kernel | Kernel coefficient |
| 1                                   | All features   | 0.8                          | linear |                    |
| 2                                   | Ankle          | 0.75                         | rbf    | 0.8                |
| 3                                   | Hip            | 1                            | rbf    | 0.9                |
| 4                                   | Knee           | 1                            | rbf    | 0.9                |
| 5                                   | GRF            | 1                            | rbf    | 0.8                |
| 6                                   | All except GRF | 1                            | rbf    | 0.3                |

## Python Code S2.3: SVM Machine Learning Model Implementation

```

SVM_model = SVC(kernel = 'linear' , C=1 ,probability=True)
SVM_model.fit(X_train, y_train)
y_pred_svm = SVM_model.predict(X_test)

```

## Python Code S2.4: SVM Model Scores

```

cm = confusion_matrix(y_test, y_pred_svm)
# calculate DP
sensitivity = imblearn.metrics.sensitivity_score(y_test, y_pred_svm)
specificity = imblearn.metrics.specificity_score(y_test, y_pred_svm)
D = sensitivity/(1-sensitivity)
P = specificity/(1-specificity)
DP = (numpy.sqrt(3)/pi)*(log(D) + log(P))

print("Confusion Matrix:")
print(cm)
print(f"Accuracy: {metrics.accuracy_score(y_test, y_pred_svm): .3f}")
print(f"Matthew's correlation coefficient:{metrics.matthews_corrcoef(y_test, y_pred_svm): .3f}")
print(f"G-mean:{imblearn.metrics.geometric_mean_score(y_test, y_pred_svm, average='binary'): .3f}")
print(f"DP:{DP: .3f}")

```

## Output:

```
Confusion Matrix:
[[12  4]
 [21 52]]
Accuracy: 0.719
Matthew's correlation coefficient: 0.368
G-mean: 0.731
DP: 1.106\
```

## Random Forrest

Table S4: Random Forest Model Hyperparameters

| Group Number | Category       | number of trees | criterion | maximum depth of the tree |
|--------------|----------------|-----------------|-----------|---------------------------|
| 1            | All features   | 250             | gini      | 20                        |
| 2            | Ankle          | 125             | gini      | 50                        |
| 3            | Hip            | 250             | gini      | 50                        |
| 4            | Knee           | 25              | entropy   | 20                        |
| 5            | GRF            | 125             | gini      | 50                        |
| 6            | All except GRF | 125             | gini      | 50                        |

## Python Code S2.5: Random Forest Machine Learning Model Implementation

```
RF_model = RandomForestClassifier(n_estimators = 250, criterion = 'gini', max_depth=20)
RF_model.fit(X_train, y_train)
y_pred_rf = RF_model.predict(X_test)
```

## Python Code S2.6: Random Forest Model Scores

```
cm = confusion_matrix(y_test, y_pred_rf)
# calculate DP
sensitivity = imblearn.metrics.sensitivity_score(y_test, y_pred_rf)
specificity = imblearn.metrics.specificity_score(y_test, y_pred_rf)
D = sensitivity/(1-sensitivity)
P = specificity/(1-specificity)
DP = (numpy.sqrt(3)/pi)*(log(D) + log(P))

print("Confusion Matrix:")
print(cm)
print(f"Accuracy: {metrics.accuracy_score(y_test, y_pred_rf): .3f}")
print(f"Matthew's correlation coefficient:{metrics.matthews_corrcoef(y_test, y_pred_rf): .3f}")
print(f"G-mean:{imblearn.metrics.geometric_mean_score(y_test, y_pred_rf, average='binary'):.3f}")
print(f"DP:{DP: .3f}")
```

## Output:

```
Confusion Matrix:
[[12  4]
 [ 6 67]]
Accuracy: 0.888
Matthew's correlation coefficient: 0.638
G-mean: 0.830
DP: 1.936
```

## Logistic Regression

### Python Code S2.7: Logistic Regression Machine Learning Model Implementation

```
classifier = LogisticRegression(random_state = 0)
classifier.fit(X_train, y_train)
y_pred_lg = classifier.predict(X_test)
```

### Python Code S2.8: Logistic Regression Model Scores

```
cm = confusion_matrix(y_test, y_pred_lg)
# calculate DP
sensitivity = imblearn.metrics.sensitivity_score(y_test, y_pred_lg)
specificity = imblearn.metrics.specificity_score(y_test, y_pred_lg)
D = sensitivity/(1-sensitivity)
P = specificity/(1-specificity)
DP = (numpy.sqrt(3)/pi)*(log(D) + log(P))

print("Confusion Matrix:")
print(cm)
print(f"Accuracy: {metrics.accuracy_score(y_test, y_pred_lg): .3f}")
print(f"Matthew's correlation coefficient:{metrics.matthews_corrcoef(y_test, y_pred_lg): .3f}")
print(f"G-mean:{imblearn.metrics.geometric_mean_score(y_test, y_pred_lg, average='binary'):.3f}")
print(f"AGF:{AGF: .3f}")
print(f"DP:{DP: .3f}")
```

### Output:

```
Confusion Matrix:
[[14  2]
 [19 54]]
Accuracy:  0.764
Matthew's correlation coefficient: 0.489
G-mean: 0.805
AGF: 0.931
DP: 1.649
```

## Group1 Results Summary

| Model Type      | Accuracy | MCC  | DP   | G-Mean |
|-----------------|----------|------|------|--------|
| Neural Networks | 0.89     | 0.64 | 1.94 | 0.83   |
| Random Forest   | 0.89     | 0.64 | 1.94 | 0.83   |
| SVM             | 0.72     | 0.37 | 1.16 | 0.73   |
| Logistic        | 0.76     | 0.49 | 1.65 | 0.81   |

Figure S1: Summary of Models Results



# Summary of All Machine Learning models Results

| Table S5: Performance Summary of All Machine Learning Models |                 |                                |                 |                 |                 |               |                  |
|--------------------------------------------------------------|-----------------|--------------------------------|-----------------|-----------------|-----------------|---------------|------------------|
| Metric                                                       | Model Type      | Group Category                 |                 |                 |                 |               |                  |
| Category                                                     |                 | All                            | Ankle           | Hip             | Knee            | GRF           | Ankle, Hip, Knee |
| Group Number                                                 |                 | Group 1                        | Group 2         | Group 3         | Group 4         | Group 5       | Group 6          |
| Accuracy                                                     | Neural Networks | 0.89                           | 0.79            | 0.78            | 0.81            | 0.82          | 0.84             |
|                                                              | Random Forest   | 0.89                           | 0.69            | 0.73            | 0.75            | 0.87          | 0.83             |
|                                                              | SVM             | 0.72                           | 0.76            | 0.80            | 0.75            | 0.73          | 0.82             |
| DP                                                           | Neural Networks | 1.94                           | 0.95            | 0.82            | 0.90            | 1.87          | 1.33             |
|                                                              | Random Forest   | 1.94                           | 0.64            | 0.29            | 0.71            | 2.09          | 1.19             |
|                                                              | SVM             | 1.16                           | -0.16           | 0.63            | 0.08            | 1.01          | 0.74             |
| G-Mean                                                       | Neural Networks | 0.83                           | 0.65            | 0.61            | 0.54            | 0.84          | 0.84             |
|                                                              | Random Forest   | 0.83                           | 0.63            | 0.46            | 0.60            | 0.87          | 0.63             |
|                                                              | SVM             | 0.73                           | 0.24            | 0.42            | 0.33            | 0.71          | << 0             |
| MCC                                                          | Neural Networks | 0.64                           | 0.33            | 0.27            | 0.27            | 0.57          | 0.44             |
|                                                              | Random Forest   | 0.64                           | 0.22            | 0.09            | 0.24            | 0.64          | 0.39             |
|                                                              | SVM             | 0.37                           | -0.03           | 0.16            | 0.02            | 0.35          | 0.00             |
| Best Model                                                   |                 | Neural Networks, Random Forest | Neural Networks | Neural Networks | Neural Networks | Random Forest | Neural Networks  |
